# Supplementary material for: A nickel nanoparticle engineered CoFe2O4@GO–Kryptofix 22 composite: a green and retrievable catalytic system for the synthesis of 1,4-benzodiazepines in water
Source: Royal Society of Chemistry journal article supplement (doi:10.1039/d0ra01671c), 2020-01-01
Supplement: d0ra01671c1.pdf [file d0ra01671c1.pdf]

## Supplementary Information

### Nickel nanoparticles engineered CoFe<sub>2</sub>O<sub>4</sub>@GO-kryptofix 22 composite: A green and retrievable catalytic system for the synthesis of 1,4-benzodiazepines in water

11-(phenyl)-3,3-dimethyl-2,3,4,5,10,11-hexahydro-1Hdibenzo[b,e][1,4]diazepin-1-one  
(Table 2, entry 1).

<sup>1</sup>H NMR (DMSO 400 MHz)  $\delta$  (ppm) = 1.00 (s, 3H, CH<sub>3</sub>), 1.02 (s, 3H, CH<sub>3</sub>), 2.02 (d, 1H, J = 16.0 Hz, CH<sub>2</sub>), 2.10 (d, 1H, J = 15.6 Hz, CH<sub>2</sub>), 2.58 (s, 2H, CH<sub>2</sub>-C=O), 5.68 (d, 1H, J=5.6 Hz, C-H), 6.17 (d, 1H, J=6.0 Hz, N-H), 6.51 (d, 1H, J = 7.2 Hz, Ar), 6.54–6.61 (m, 2H, Ar), 6.90 (d, 1H, J= 7.2 Hz, Ar), 6.97-7.12 (m, 5H, Ar), 8.76(s, 1H, N-H); <sup>13</sup>C NMR (100 MHz, DMSO-d<sub>6</sub>)  $\delta$  (ppm) =  $\delta$  27.8, 29.0, 33.2, 40.5, 49.9, 56.3, 110.6, 119.9, 120.4,120.9, 123.1, 126.3, 127.7, 128.2, 131.4, 139, 145.2, 155.3, 192.6.

11-(4-Chlorophenyl)-3,3-dimethyl-2,3,4,5,10,11-hexahydro-1H dibenzo[b,e][1,4]diazepin-1-one (Table 2, entry 3).

<sup>1</sup>H NMR (DMSO 400 MHz)  $\delta$  (ppm) = 1.02 (s, 3H, CH<sub>3</sub>), 1.08 (s, 3H, CH<sub>3</sub>), 2.08 (d, 1H, J = 16.0 Hz, CH<sub>2</sub>), 2.19 (d, 1H, J = 16.0 Hz, CH<sub>2</sub>), 2.58 (s, 2H, CH<sub>2</sub>-C=O), 5.66 (d, 1H, J=5.6 Hz, C-H), 6.19 (d, 1H, J=5.6 Hz, N-H), 6.51 (d, 1H, J = 7.2 Hz, Ar), 6.57–6.64 (m, 2H, Ar), 6.92 (d, 1H, J = 8.0 Hz, Ar), 7.07 (d, 2H, J = 8.4 Hz, Ar), 7.17 (d, J = 8.4 Hz, 2H, Ar), 8.82(s, 1H, N-H); <sup>13</sup>C NMR (100 MHz, DMSO-d<sub>6</sub>)  $\delta$  (ppm) =  $\delta$  28.0, 28.8, 32.3, 44.5, 49.8, 55.9, 110.1, 120.3, 120.7, 121.1, 123.3, 128.1, 129.5, 130.1, 131.6, 138.8, 144.2, 155.4, 192.3

11-(4-methoxyphenyl)-3,3-dimethyl-2,3,4,5,10,11-hexahydro-1H dibenzo[b,e][1,4]diazepin-1-one (Table 2, entry 8).

<sup>1</sup>H NMR (DMSO 400 MHz)  $\delta$  (ppm) = 1.03 (s, 3H, CH<sub>3</sub>), 1.09 (s, 3H, CH<sub>3</sub>), 2.10 (d, 1H, J =16.0 Hz, CH<sub>2</sub>), 2.20 (d, 1H, J = 16.0 Hz, CH<sub>2</sub>), 2.61 (s, 2H, CH<sub>2</sub>-C=O), 3.36 (s, 3H, Me), 5.72 (d, 1H, J=5.8 Hz, C-H), 6.32 (d, 1H, J=5.9 Hz, N-H), 6.52 (d, 1H, J = 8 Hz, Ar), 6.61–6.65 (m, 2H, Ar), 6.95 (d, 1H, J = 8.0 Hz, Ar), 7.24 (d, 2H, J = 8.6 Hz, Ar), 7.61 (d, J = 8.2 Hz, 2H, Ar), 8.90(s, 1H, N-H).

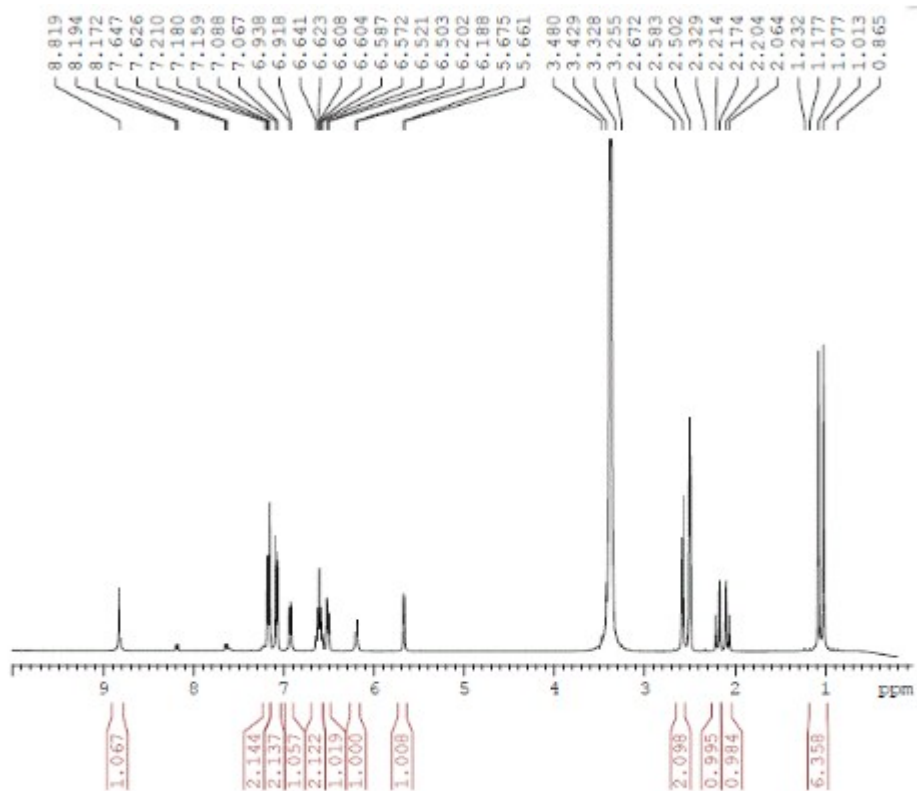

**Fig 1 S.**  $^1\text{H}$ NMR: 11-(phenyl)-3,3-dimethyl-2,3,4,5,10,11-hexahydro-1H dibenzo[b,e][1,4]diazepin-1-one

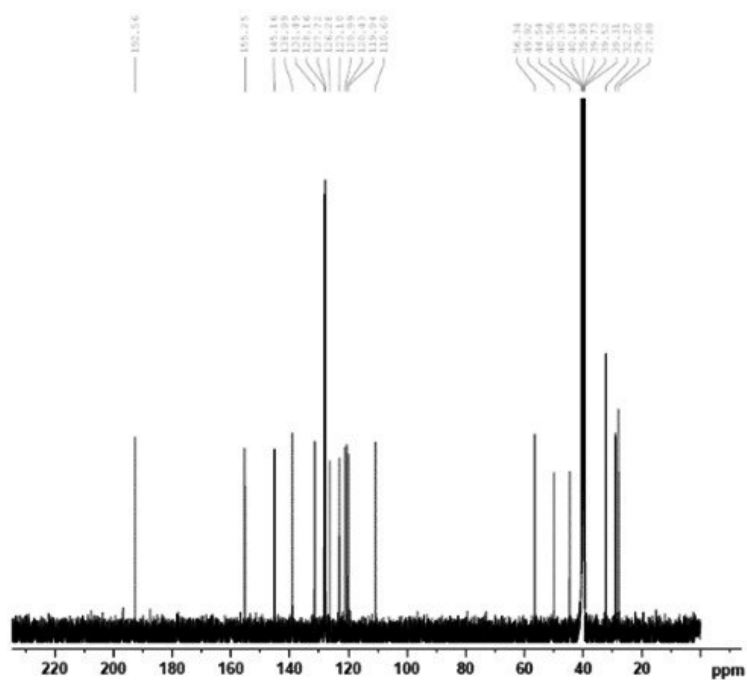

**Fig 2 S.**  $^{13}\text{C}$ NMR: 11-(phenyl)-3,3-dimethyl-2,3,4,5,10,11-hexahydro-1H dibenzo[b,e][1,4]diazepin-1-one

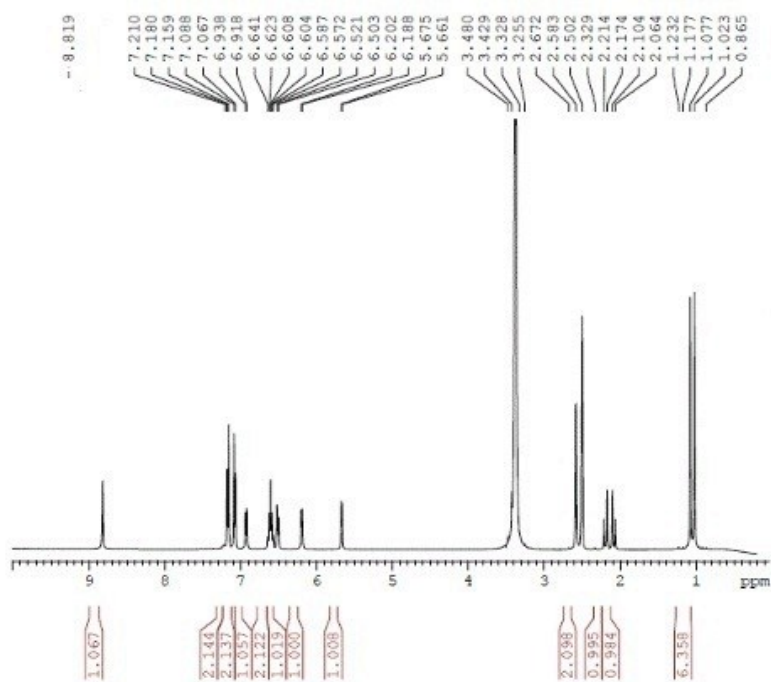

**Fig 3 S.**  $^1\text{H}$  NMR: 11-(4-Chlorophenyl)-3,3-dimethyl-2,3,4,5,10,11-hexahydro-1H dibenzo[b,e][1,4]diazepin-1-one

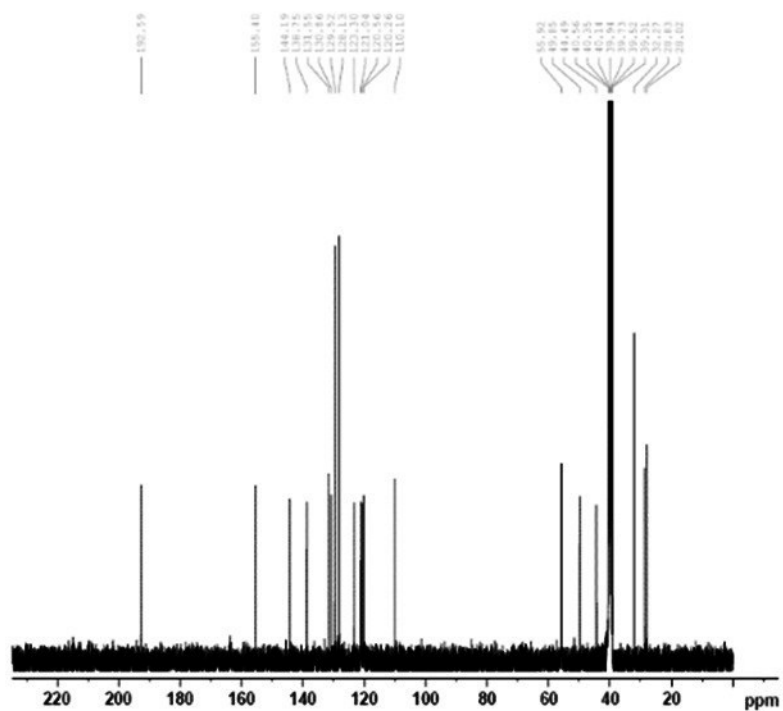

**Fig 4 S.**  $^{13}\text{C}$ NMR: 11-(4-Chlorophenyl)-3,3-dimethyl-2,3,4,5,10,11-hexahydro-1H dibenzo[b,e][1,4]diazepin-1-one

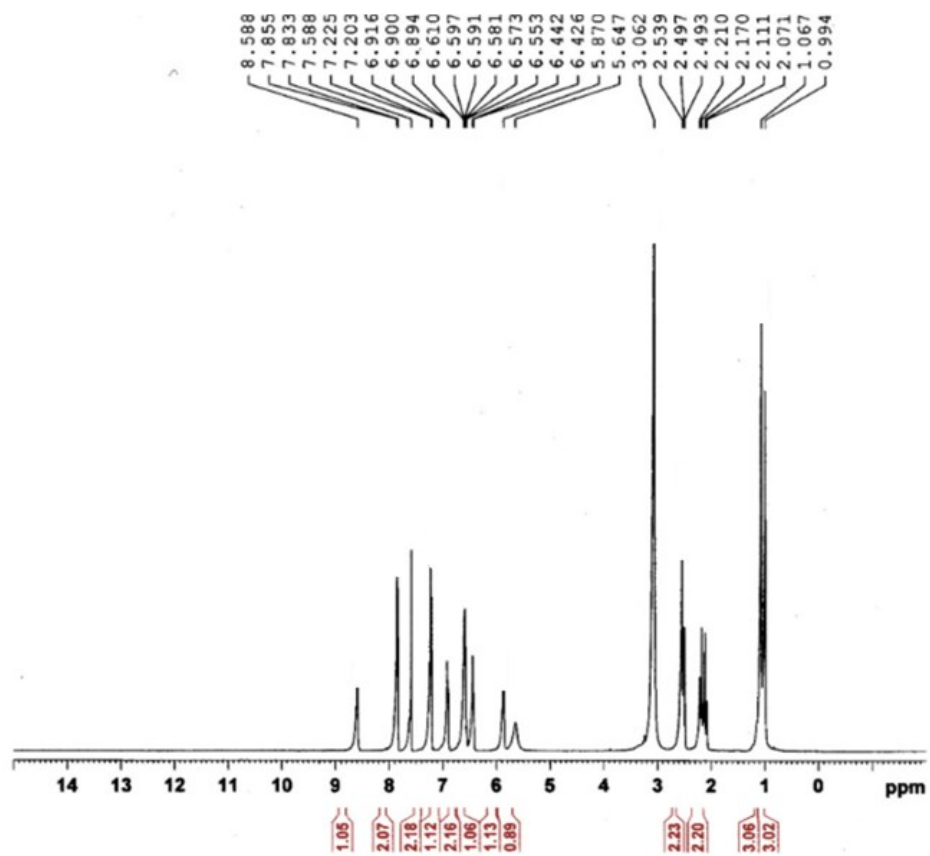

**Fig 5 S.**  $^1\text{H}$ NMR: 11-(4-Bromophenyl)-3,3-dimethyl-2,3,4,5,10,11-hexahydro-1H dibenzo[b,e][1,4]diazepin-1-one

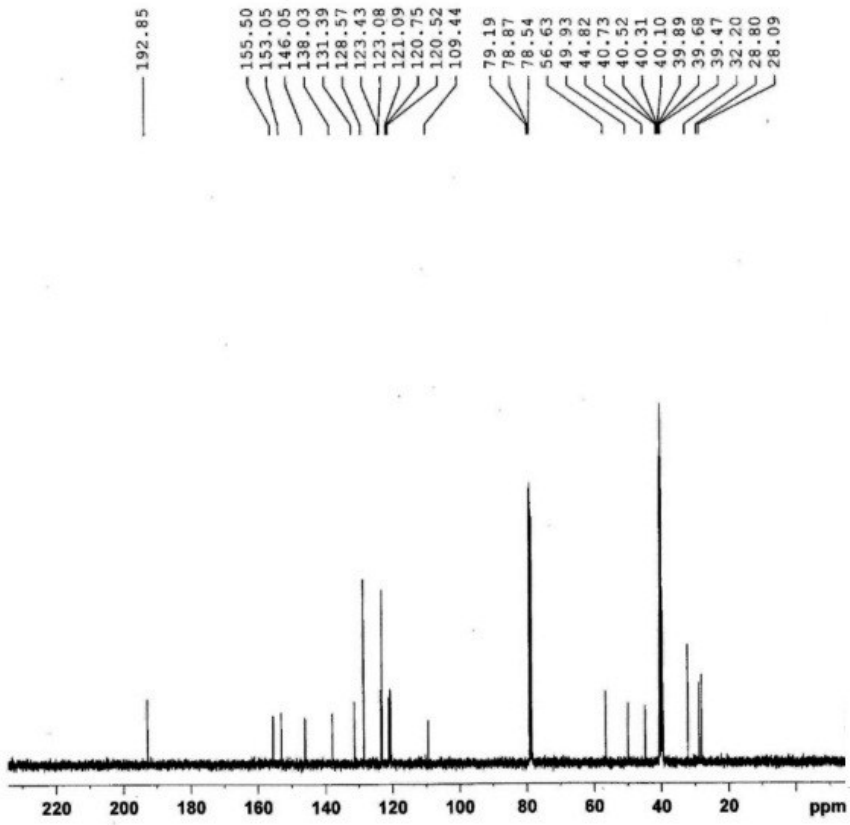

**Fig 6 S.** <sup>13</sup>CNMR: 11-(4-Bromophenyl)-3,3-dimethyl-2,3,4,5,10,11-hexahydro-1H-dibenzo[b,e][1,4]diazepin-1-one
